# Supplementary material
Source: publisher figshare collection journal article supplement (https://frontiersin.figshare.com/ndownloader/files/25209071)
Supplement: Supplementary file 1 [file 25209071]

**Supplementary Material**

**
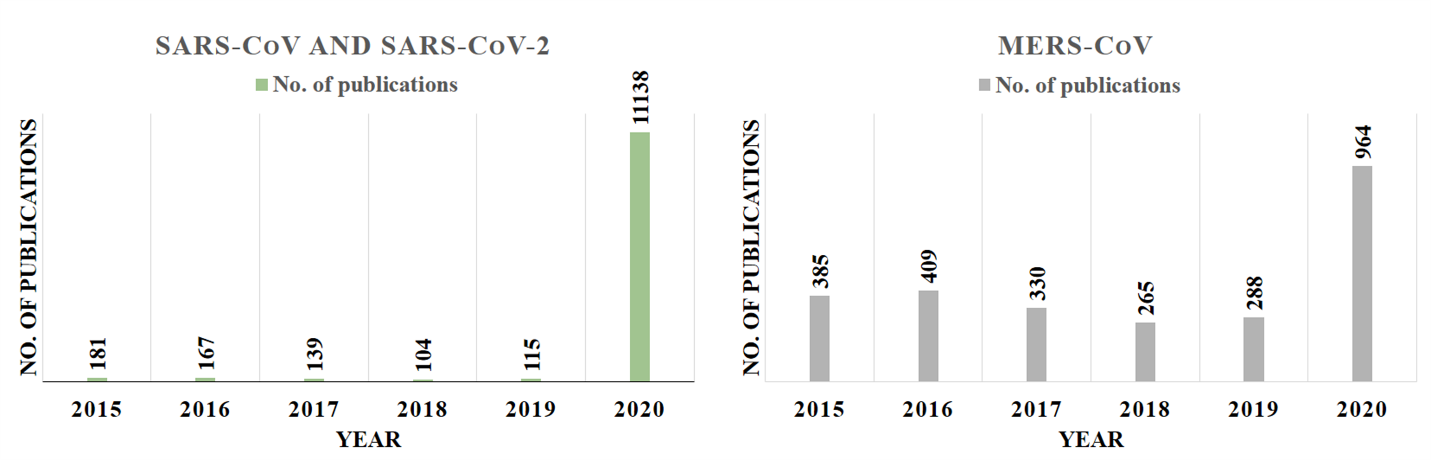
**

**Fig. S1.** Survey of publications on coronavirus

**Table S1.** Summary of anti-viral NPs against several viral pathogen

| **Type of NPs** | **Virus** | **Mode of action** | **Reference** |
| --- | --- | --- | --- |
| **Gold NPs** | HIV-1 | Binds to gp120 and prevents CD4 attachment and viral entry into cells | ([Vijayakumar and Ganesan, 2012](#_ENREF_11)) |
| Dengu virus | Inhibits viral replication by preventing the degradation of anti-DENV siRNA payload | ([Paul et al., 2014](#_ENREF_8)) |
| Herpes simplex virus type-I | Interferes with the viral attachment process and prevents cell-to-cell spread | ([Baram‐Pinto et al., 2010](#_ENREF_2)) |
| **Silver NPs** | Hepatitis B virus (HBV) | Binds to dsDNA of HBV and prevents further production HBV RNA | ([Lu et al., 2008](#_ENREF_5)) |
| Influenza virus | Disrupts the viral membrane glycoprotein protein knobs | ([Mehrbod et al., 2009](#_ENREF_6)) |
| **Copper –based NPs** | Influenza A virus | 160 nm NPs were seen to generate hydroxyl radicals and destruct the viral proteins | ([Fujimori et al., 2012](#_ENREF_3)) |
| Feline calicivirus | Reduce the infectivity of Feline calicivirus (FCV) by generating ROS | ([Shionoiri et al., 2012](#_ENREF_9)) |
| **Titanium oxide NPs** | Newcastle virus (NDV) | Destruction of the lipids of the viral envelope | ([Akhtar et al., 2019](#_ENREF_1)) |
| Influenza A virus | UV-activated NPs produced ROS and disrupted outer membrane protein and viral nucleic acids | ([Monmaturapoj et al., 2018](#_ENREF_7)) |
| **Zinc oxide NPs** | Influenza A virus | Interferes with the life cycle of the virus and reduces its infectivity | ([Ghaffari et al., 2019](#_ENREF_4)) |
| Herpes simplex virus type-I | Interferes with viral protein expression and inhibits DNA replication | ([Tavakoli et al., 2018](#_ENREF_10)) |

**
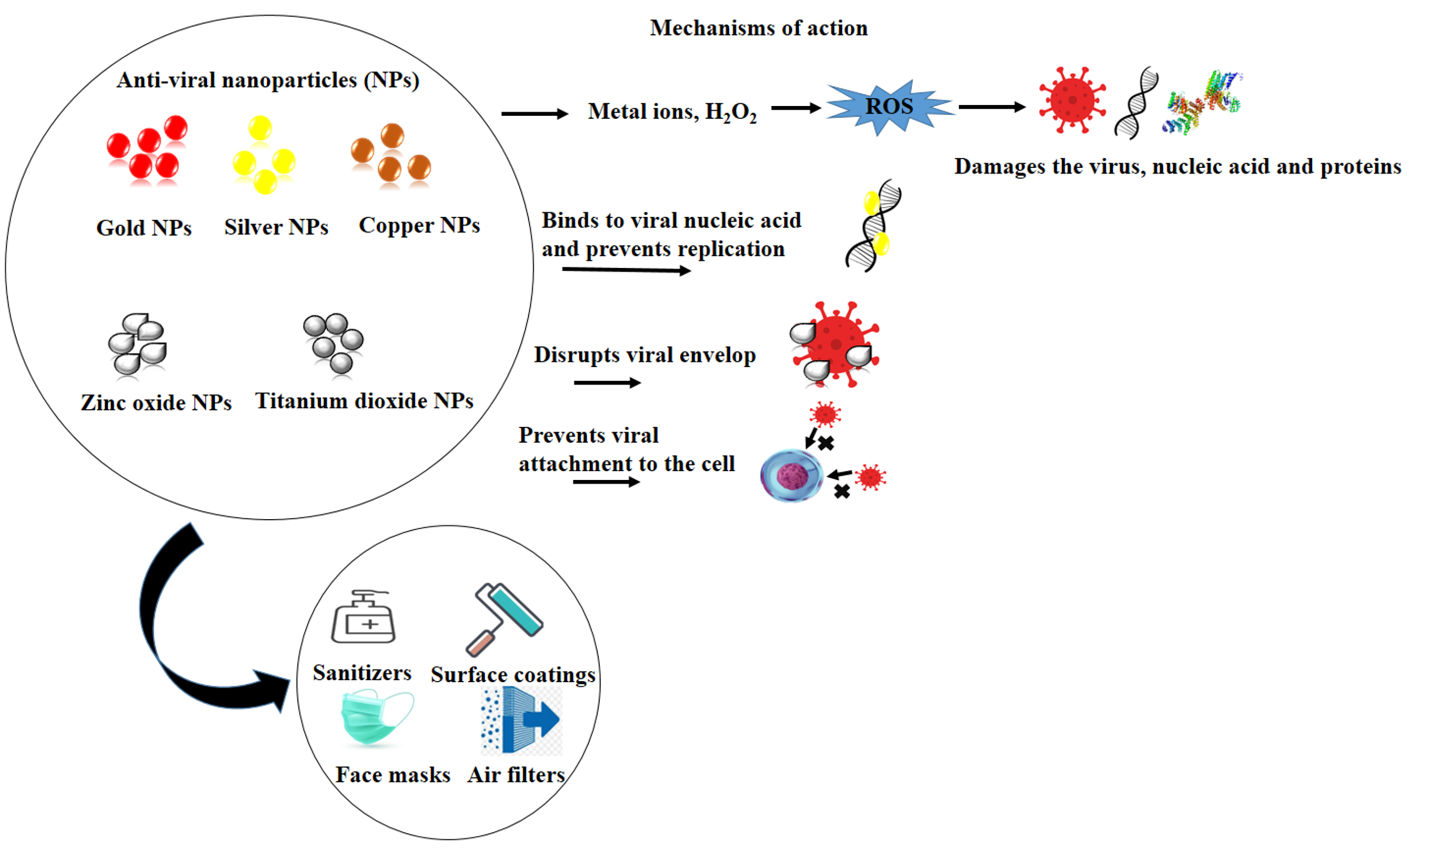
**

**Scheme S1**. Utilizing nanoparticles for prevention against COVID-19

**References:**

Akhtar, S., Shahzad, K., Mushtaq, S., Ali, I., Rafe, M.H., and Fazal-Ul-Karim, S.M. (2019). Antibacterial and antiviral potential of colloidal Titanium dioxide (TiO2) nanoparticles suitable for biological applications. *Materials Research Express* 6**,** 105409.

Baram‐Pinto, D., Shukla, S., Gedanken, A., and Sarid, R. (2010). Inhibition of HSV‐1 attachment, entry, and cell‐to‐cell spread by functionalized multivalent gold nanoparticles. *Small* 6**,** 1044-1050.

Fujimori, Y., Sato, T., Hayata, T., Nagao, T., Nakayama, M., Nakayama, T., Sugamata, R., and Suzuki, K. (2012). Novel antiviral characteristics of nanosized copper (I) iodide particles showing inactivation activity against 2009 pandemic H1N1 influenza virus. *Applied and environmental microbiology* 78**,** 951-955.

Ghaffari, H., Tavakoli, A., Moradi, A., Tabarraei, A., Bokharaei-Salim, F., Zahmatkeshan, M., Farahmand, M., Javanmard, D., Kiani, S.J., and Esghaei, M. (2019). Inhibition of H1N1 influenza virus infection by zinc oxide nanoparticles: another emerging application of nanomedicine. *Journal of biomedical science* 26**,** 1-10.

Lu, L., Sun, R., Chen, R., Hui, C.-K., Ho, C.-M., Luk, J.M., Lau, G., and Che, C.-M. (2008). Silver nanoparticles inhibit hepatitis B virus replication. *Antiviral therapy* 13**,** 253.

Mehrbod, P., Motamed, N., Tabatabaeian, M., Soleymani, E.R., Amini, E., Shahidi, M., and Kheyri, M. (2009). IN VITRO ANTIVIRAL EFFECT OF.

Monmaturapoj, N., Sri-On, A., Klinsukhon, W., Boonnak, K., and Prahsarn, C. (2018). Antiviral activity of multifunctional composite based on TiO2-modified hydroxyapatite. *Materials Science and Engineering: C* 92**,** 96-102.

Paul, A.M., Shi, Y., Acharya, D., Douglas, J.R., Cooley, A., Anderson, J.F., Huang, F., and Bai, F. (2014). Delivery of antiviral small interfering RNA with gold nanoparticles inhibits dengue virus infection in vitro. *The Journal of general virology* 95**,** 1712.

Shionoiri, N., Sato, T., Fujimori, Y., Nakayama, T., Nemoto, M., Matsunaga, T., and Tanaka, T. (2012). Investigation of the antiviral properties of copper iodide nanoparticles against feline calicivirus. *Journal of bioscience and bioengineering* 113**,** 580-586.

Tavakoli, A., Ataei-Pirkooh, A., Mm Sadeghi, G., Bokharaei-Salim, F., Sahrapour, P., Kiani, S.J., Moghoofei, M., Farahmand, M., Javanmard, D., and Monavari, S.H. (2018). Polyethylene glycol-coated zinc oxide nanoparticle: an efficient nanoweapon to fight against herpes simplex virus type 1. *Nanomedicine* 13**,** 2675-2690.

Vijayakumar, S., and Ganesan, S. (2012). Gold nanoparticles as an HIV entry inhibitor. *Current HIV research* 10**,** 643-646.
